# Supplementary material for: Hydroxypropyl-β-cyclodextrin as a versatile additive for the formation of metastable tetragonal zirconia exhibiting high thermal stability
Source: Royal Society of Chemistry journal article supplement (doi:10.1039/c2ce26540k), 2012-11-29
Supplement: c2ce26540k.pdf [file c2ce26540k.pdf]

*Electronic Supporting Information*

**Hydroxypropyl- $\beta$ -cyclodextrin as a versatile additive for the formation of metastable tetragonal zirconia exhibiting high thermal stability**

Lei Bai,<sup>abd</sup> Frédéric Wyrwalski,<sup>abd</sup>, Cécile Machut<sup>abd</sup>, Pascal Roussel,<sup>acd</sup> Eric Monflier,<sup>abd</sup> and Anne Ponchel\*<sup>abd</sup>

<sup>a</sup> Univ Lille Nord de France, F-59000 Lille, France

<sup>b</sup> UArtois, UCCS, Faculté des Sciences Jean Perrin, Rue Jean Souvraz, F-62300 Lens, France

<sup>c</sup> Ecole Nationale Supérieure de Chimie de Lille, UCCS, F-59650 Villeneuve d'Ascq, France

<sup>d</sup> CNRS, UMR 8181, France.

**Table S1.** Chemical structure and characteristics of the cyclodextrin derivatives

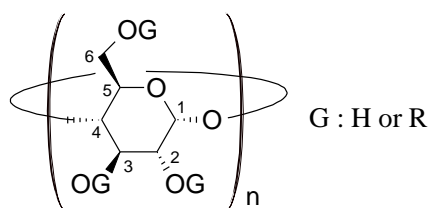

| Abbreviation         | n | Substituent R                         | Carbons bearing the OR group | Number of R groups per CD | Molecular weight (g mol <sup>-1</sup> ) |
|----------------------|---|---------------------------------------|------------------------------|---------------------------|-----------------------------------------|
| $\alpha$ -CD         | 6 | (-)                                   | (-)                          | 0                         | 972                                     |
| $\gamma$ -CD         | 8 | (-)                                   | (-)                          | 0                         | 1297                                    |
| HP- $\beta$ -CD      | 7 | CH <sub>2</sub> -CHOH-CH <sub>3</sub> | 2, 3 and 6                   | 4.2                       | 1380                                    |
| CrysMe- $\alpha$ -CD | 7 | CH <sub>3</sub>                       | 2, 3 and 6                   | 4.9                       | 1204                                    |
| RaMe- $\beta$ -CD    | 7 | CH <sub>3</sub>                       | 2, 3 and 6                   | 12.6                      | 1314                                    |

**Table S2.** Structural parameters by Rietveld refinement of the calcined zirconia samples

| Sample     | Method | Additive            | Weight ratio (%)          | Lattice constants          |                                   |                      |            |
|------------|--------|---------------------|---------------------------|----------------------------|-----------------------------------|----------------------|------------|
|            |        |                     |                           | a, b, c (Å)                | $\alpha, \beta, \gamma$ (deg)     | Crystallite size (Å) | Strain (%) |
| Zr-Ref     | 1      | /                   | m-ZrO <sub>2</sub> : 84.8 | a=5.142; b=5.194; c =5.306 | $\alpha, \gamma=90; \beta=98.909$ | 82.8                 | 0.0029     |
|            |        |                     | t-ZrO <sub>2</sub> : 15.2 | a, b=3.590; c =5.1571      | $\alpha, \beta, \gamma=90$        | 94.0                 | 0.0045     |
| Zr-HP1     | 1      | HP- $\beta$ -CD     | t-ZrO <sub>2</sub> : 100  | a, b=3.598; c =5.173       | $\alpha, \beta, \gamma=90$        | 392                  | 0.0044     |
| Zr_HP3     | 3      | HP- $\beta$ -CD     | m-ZrO <sub>2</sub> : 31.4 | a=5.145; b=5.184; c =5.312 | $\alpha, \gamma=90; \beta=98.60$  | 69.0                 | 0.0028     |
|            |        |                     | t-ZrO <sub>2</sub> : 68.6 | a, b=3.620; c =5.081       | $\alpha, \beta, \gamma=90$        | 272                  | 0.0055     |
| Zr_CD3     | 3      | $\alpha$ -CD        | t-ZrO <sub>2</sub> : 100  | a, b=3.594; c =5.156       | $\alpha, \beta, \gamma=90$        | 327                  | 0.0052     |
| Zr_CrysMe3 | 3      | CrysMe- $\beta$ -CD | m-ZrO <sub>2</sub> : 18.2 | a=5.145; b=5.184; c =5.312 | $\alpha, \gamma=90; \beta=98.60$  | 26.8                 | 0.0152     |
|            |        |                     | t-ZrO <sub>2</sub> : 81.8 | a, b=3.5963; c =5.156      | $\alpha, \beta, \gamma=90$        | 403                  | 0.0056     |
| Zr_RaMe3   | 3      | RaMe- $\beta$ -CD   | m-ZrO <sub>2</sub> : 51.8 | a=5.171; b=5.185; c =5.325 | $\alpha, \gamma=90; \beta=98.47$  | 57.6                 | 0.0052     |
|            |        |                     | t-ZrO <sub>2</sub> : 48.2 | a, b=3.607; c =5.161       | $\alpha, \beta, \gamma=90$        | 58.1                 | 0.0030     |

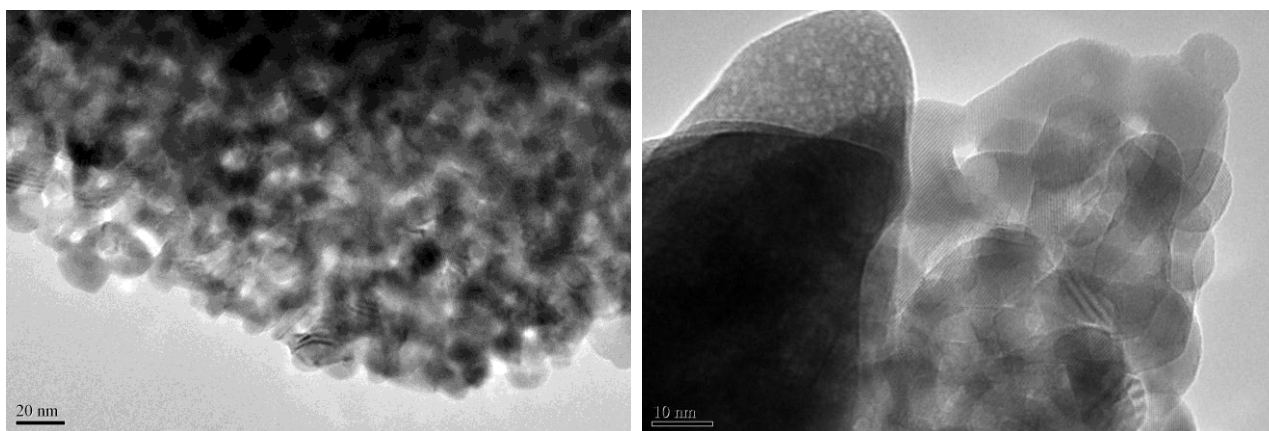

**Fig. S1.** TEM pictures of the controlled ZrO<sub>2</sub> (Zr-Ref) with different magnifications : (a) 20 nm and (b) 10 nm

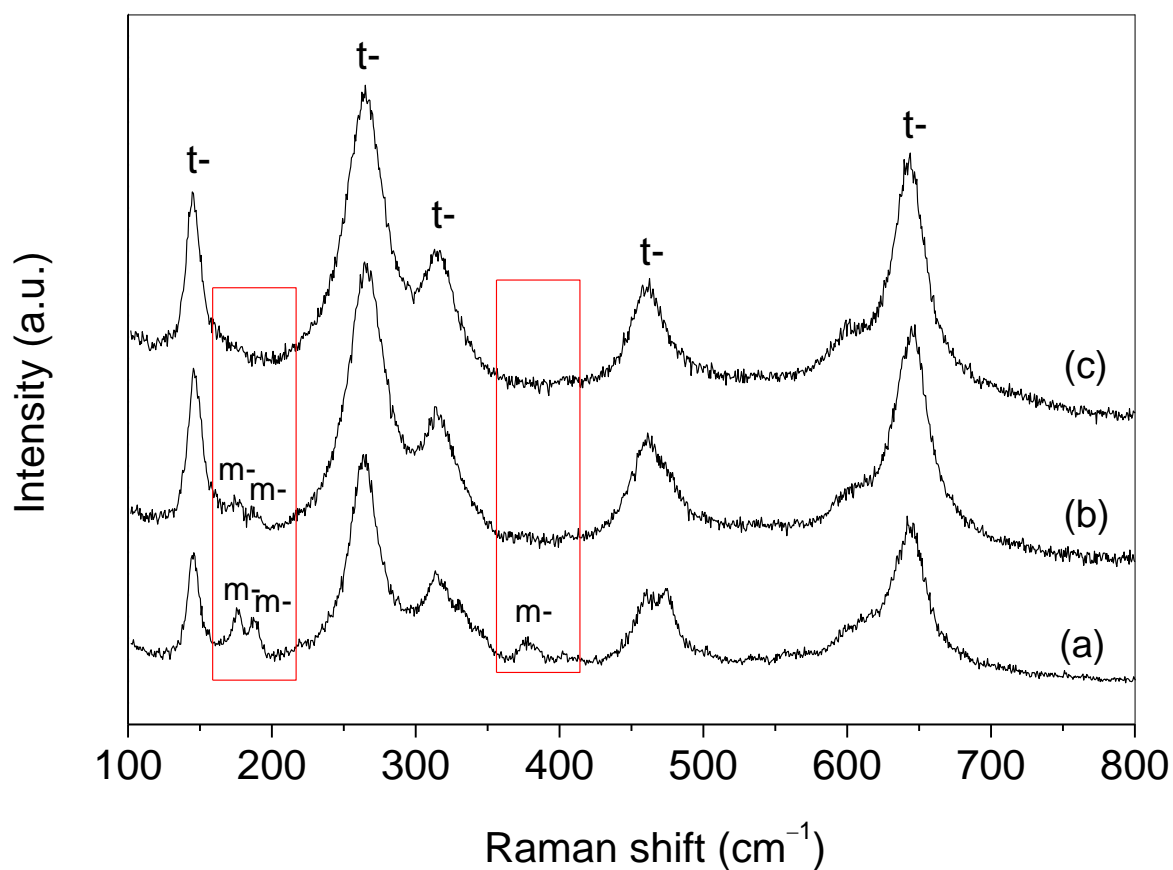

**Fig. S2.** Raman spectra of ZrO<sub>2</sub> materials after calcination at 600°C for 4 hours obtained from the different methods of precipitation: (a) addition of HP-β-CD in the ZrOCl<sub>2</sub> solution as described in the method 2, (b) addition of HP-β-CD in the NH<sub>3</sub>·H<sub>2</sub>O solution as described in the method 3 and (c) addition of HP-β-CD both in the ZrOCl<sub>2</sub> and NH<sub>3</sub>·H<sub>2</sub>O solutions as described in the method 1. m- and t- indicate the monoclinic and tetragonal phase, respectively.

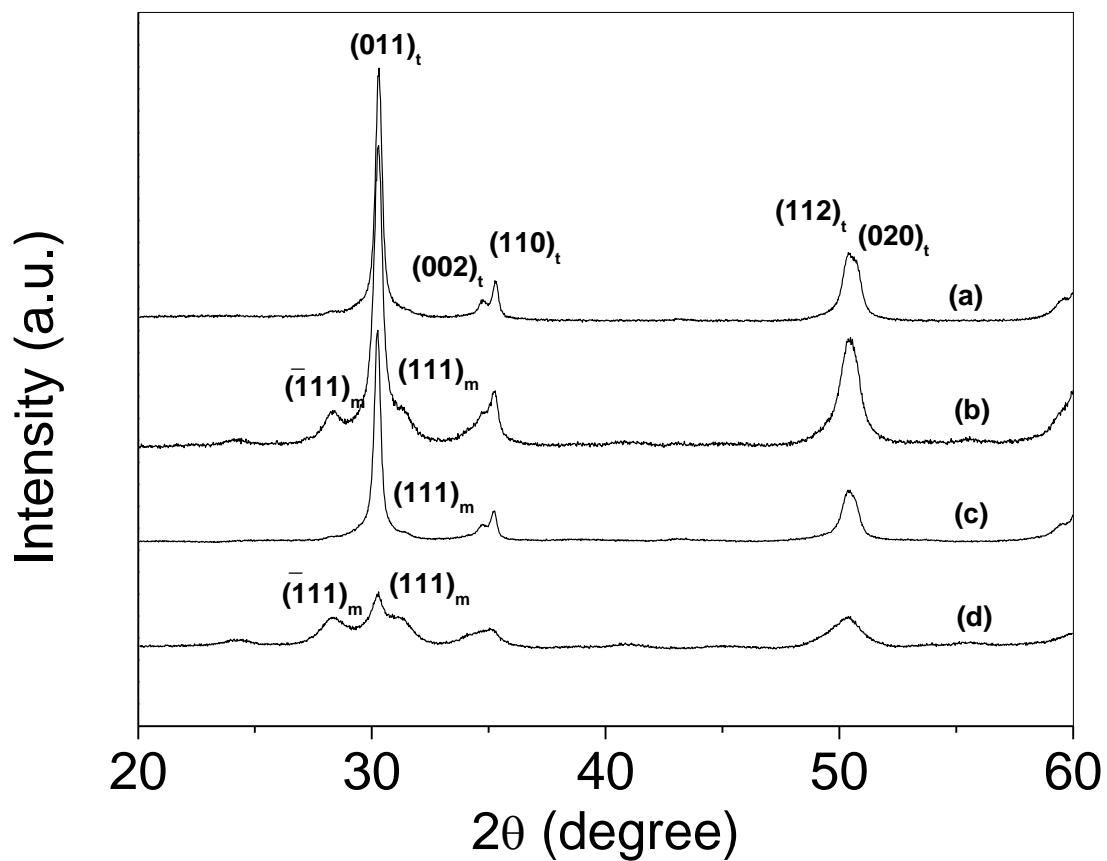

**Fig. S3.** XRD patterns of  $ZrO_2$  materials after calcination at  $600^\circ\text{C}$  for 4 hours obtained from the method 3 by using the following organic additive: (a) of  $\alpha$ -CD, (b) HP- $\beta$ -CD, (c) CrysMe- $\beta$ -CD and (d) RaMe- $\beta$ -CD.
